# Supplementary material
Source: PubMed Central journal article supplement (PMC6243246)
Supplement: pnas.1811962115.sapp.pdf [file pnas.1811962115.sapp.pdf]

Supporting Information for:

### Birth delivery mode alters perinatal cell death in the mouse brain

Alexandra Castillo-Ruiz, Morgan Mosley, Andrew J. Jacobs, Yarely C. Hoffiz, and Nancy G. Forger

Corresponding author: [nforger@gsu.edu](mailto:nforger@gsu.edu)

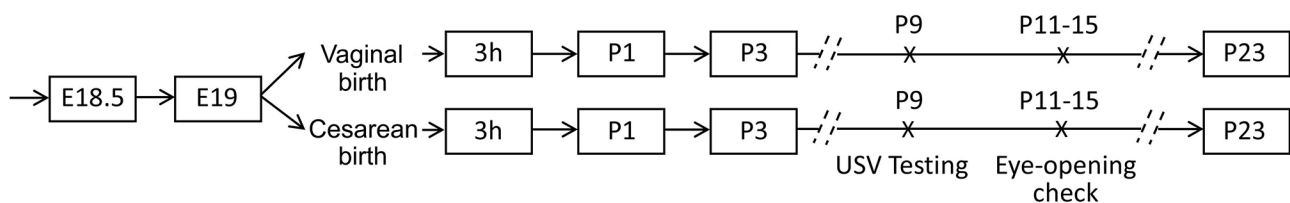

Fig. S1. Schematic of experimental timeline. Boxes represent the time points at which brains were collected.

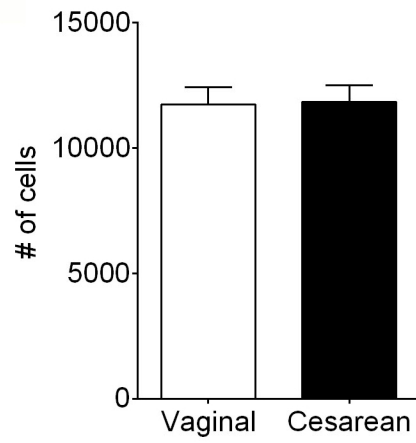

Fig. S2. Birth mode did not affect the total number of cells in the PVN of mouse weanlings. Mean  $\pm$  SEM.  $N = 10-11$  mice per group.

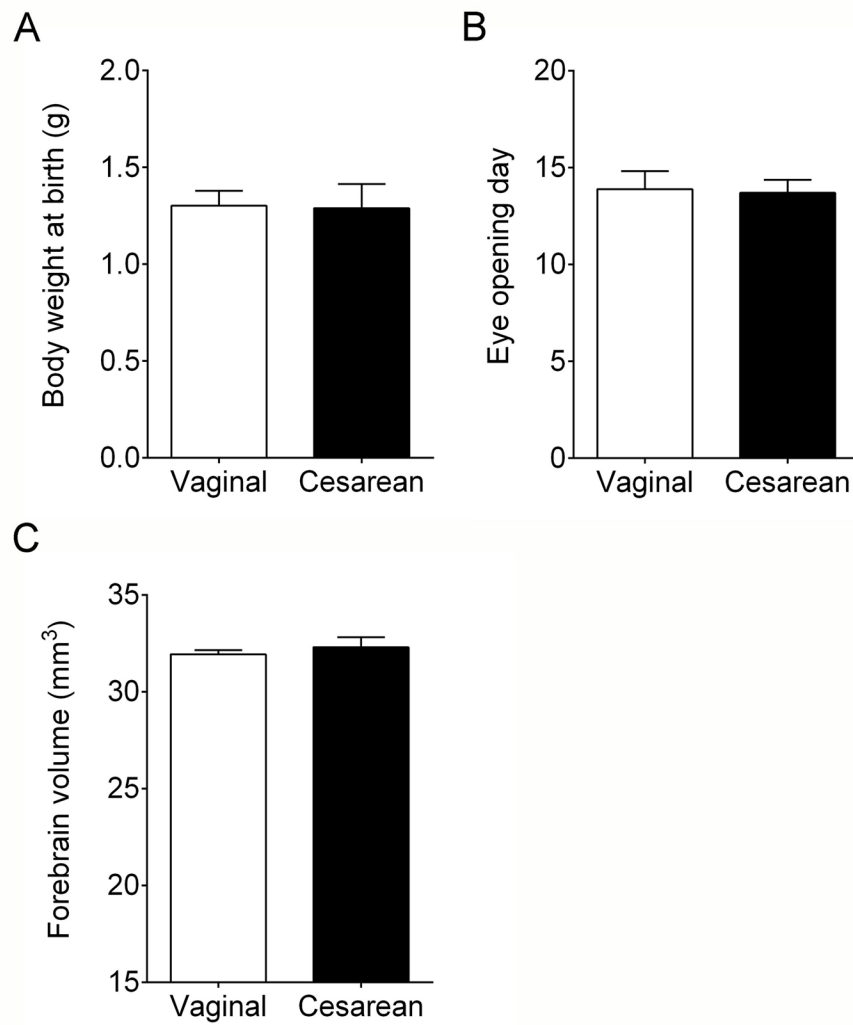

Fig. S3. Birth mode did not affect body weight at birth (A), eye-opening day (B) or forebrain size at weaning (C). Mean  $\pm$  SEM.  $N = 10-18$  mice per group.
